# Supplementary material
Source: Hindawi journal article supplement (doi:10.1155/2012/365104)
Supplement: f1 [file 365104.f1.pdf]

Supplementary Table 1 : The filename, LRI cutoff value, and physical position in samples used for InDel analysis in this study

| Filename  | LRI cutoff | InDel Type | Location           | Variation Position |
|-----------|------------|------------|--------------------|--------------------|
| 001-Del-1 | 2.69       | 1bp Delete | gi 224589801 chr10 | 24884787           |
| 002-Del-1 | 2.65       | 1bp Delete | gi 224589801 chr10 | 24884787           |
| 003-Del-1 | 1.98       | 1bp Delete | gi 224589803 chr12 | 51442577           |
| 004-Del-1 | 2.72       | 1bp Delete | gi 224589803 chr12 | 48237736           |
| 005-Del-1 | 1.94       | 1bp Delete | gi 224589803 chr12 | 48237736           |
| 006-Del-1 | 2.50       | 1bp Delete | gi 224589801 chr10 | 24884787           |
| 007-Del-1 | 1.93       | 1bp Delete | gi 224589803 chr12 | 51442577           |
| 008-Del-1 | 3.00       | 1bp Delete | gi 224589822 chrX  | 69176881           |
| 009-Del-1 | 3.20       | 1bp Delete | gi 224589822 chrX  | 69176881           |
| 010-Del-1 | 3.86       | 1bp Delete | gi 224589801 chr10 | 24884787           |
| 011-Del-1 | 3.85       | 1bp Delete | gi 224589801 chr10 | 24884787           |
| 013-Ins-9 | 3.76       | 9bp Insert | gi 224589819 chr7  | 55249011           |
| 016-Ins-6 | 3.43       | 6bp Insert | gi 224589819 chr7  | 55249013           |
| 017-Ins-6 | 3.58       | 6bp Insert | gi 224589819 chr7  | 55249013           |

Supplementary Table 2 : The filename, LRI cutoff value and repeat structure in samples used for microsatellite analysis in this study

| Filename     | Lri cutoff  | Repeat Structure   |                    |
|--------------|-------------|--------------------|--------------------|
| 126-uSat -CA | <b>3.02</b> | [CA] <sub>16</sub> | [CA] <sub>15</sub> |
| 127-uSat -AC | <b>2.00</b> | [AC] <sub>24</sub> | [CA] <sub>22</sub> |
| 151-uSat -TG | 2.00        | [TG] <sub>23</sub> | [TG] <sub>22</sub> |
| 158-uSat -TG | 2.00        | [TG] <sub>18</sub> | [TG] <sub>17</sub> |
| 159-uSat -TG | 2.00        | [TG] <sub>18</sub> | [TG] <sub>17</sub> |
| 161-uSat -CA | <b>3.28</b> | [CA] <sub>18</sub> | [CA] <sub>17</sub> |
| 162-uSat -CA | <b>3.13</b> | [CA] <sub>18</sub> | [CA] <sub>17</sub> |
| 163-uSat -TG | 2.00        | [TG] <sub>18</sub> | [TG] <sub>17</sub> |
| 183-uSat -TG | 2.00        | [TG] <sub>18</sub> | [TG] <sub>17</sub> |
| 187-uSat -TG | 2.00        | [TG] <sub>18</sub> | [TG] <sub>17</sub> |
| 188-uSat -CA | 2.00        | [CA] <sub>18</sub> | [CA] <sub>17</sub> |
| 192-uSat -CA | 2.00        | [CA] <sub>18</sub> | [CA] <sub>17</sub> |
| 194-uSat -CA | 2.00        | [CA] <sub>23</sub> | [CA] <sub>22</sub> |

Supplementary Table 3 : The primer paris designed for amplification of 10 CODIS locus in this study

| Name      | primer_F                 | primer_R                     | Product Size |
|-----------|--------------------------|------------------------------|--------------|
| msTH01    | CTAGTCAGCACCCCAACCAG     | TCCCTGAGAAGGTACCTGGA         | 434 bp       |
| msCSF1PO  | GGAACATATGCAAGGCTCAAA    | CAGACTCTTCCACACACCACTG       | 600 bp       |
| msTPOX    | CACTGCTCTGTCGTGACTCC     | GAGGAAGGGCTGTGTTTCAG         | 387 bp       |
| msD13S317 | TTTGGGTAGGAAAAAGAGTGGA   | TTGATGTATTGCAAGCACTTAGTT     | 482 bp       |
| msD16S539 | CAAGCGAAAGTGATGCCATA     | ATCTGCCCTCATCAGTGGAC         | 573 bp       |
| msD5S818  | TTTTGAAAATACATGGGAGAAAA  | CCATCTGGATAGTGGACCTCA        | 454 bp       |
| msD3S1358 | CAGCGAGACCCCATCTCTTA     | AGCTGCCAGGGCACTGCT           | 391 bp       |
| msD8S1179 | CACAGCTATTATCAAAAACCCAGA | GCTGAGTCTGAAGTAAGTAAAAACATTG | 500 bp       |
| msFGA     | TGAAATGCAATCAAACCAACT    | GCCTTCCTTTCCCTCTACTC         | 600 bp       |
| msD21S11  | TGTCTGGCACCCAGTAAAAA     | CTTTGGCCTCAAACCTGAAGG        | 486 bp       |

Supplementary Table 4 : The filename, LRI cutoff value and repeat structure in samples analyzing CODIS pattern in this study

| Filename            | Lri cutoff | Repeat Structure                                                                                                                                                                                                                                                                      | Note |
|---------------------|------------|---------------------------------------------------------------------------------------------------------------------------------------------------------------------------------------------------------------------------------------------------------------------------------------|------|
| 200-CODIS-CSF1PO-1  | 1.64       | [AGAT] <sub>10</sub><br>[AGAT] <sub>13</sub>                                                                                                                                                                                                                                          |      |
| 201-CODIS-CSF1PO-2  | 2.00       | [AGAT] <sub>12</sub><br>[AGAT] <sub>12</sub>                                                                                                                                                                                                                                          |      |
| 202-CODIS-CSF1PO-3  | 2.00       | [AGAT] <sub>12</sub><br>[AGAT] <sub>12</sub>                                                                                                                                                                                                                                          |      |
| 203-CODIS-D13S317-1 | 1.58       | [TATC] <sub>9</sub><br>[TATC] <sub>11</sub>                                                                                                                                                                                                                                           |      |
| 204-CODIS-D13S317-2 | 3.27       | [TATC] <sub>8</sub><br>[TATC] <sub>11</sub>                                                                                                                                                                                                                                           |      |
| 205-CODIS-D13S317-3 | 2.20       | [TATC] <sub>8</sub><br>[TATC] <sub>9</sub>                                                                                                                                                                                                                                            |      |
| 206-CODIS-D16S539-1 | 2.00       | [GATA] <sub>11</sub><br>[GATA] <sub>11</sub>                                                                                                                                                                                                                                          |      |
| 207-CODIS-D16S539-2 | 3.79       | [GATA] <sub>9</sub><br>[GATA] <sub>12</sub>                                                                                                                                                                                                                                           |      |
| 208-CODIS-D16S539-3 | 3.13       | [GATA] <sub>11</sub><br>[GATA] <sub>12</sub>                                                                                                                                                                                                                                          |      |
| 209-CODIS-D21S11-1  | 2.50       | [TCTA] <sub>6</sub> [TCTG] <sub>6</sub> [TCTA] <sub>3</sub> TA[TCTA] <sub>3</sub> TCA[TCTA] <sub>2</sub> TCCA TA [TCTA] <sub>10</sub><br>[TCTA] <sub>6</sub> [TCTG] <sub>6</sub> [TCTA] <sub>3</sub> TA[TCTA] <sub>3</sub> TCA[TCTA] <sub>2</sub> TCCA TA[TCTA] <sub>12</sub> TA TCTA |      |
| 210-CODIS-D21S11-2  | 2.67       | [TCTA] <sub>5</sub> [TCTG] <sub>6</sub> [TCTA] <sub>3</sub> TA[TCTA] <sub>3</sub> TCA[TCTA] <sub>2</sub> TCCA TA [TCTA] <sub>13</sub><br>[TCTA] <sub>4</sub> [TCTG] <sub>6</sub> [TCTA] <sub>3</sub> TA[TCTA] <sub>3</sub> TCA[TCTA] <sub>2</sub> TCCA TA [TCTA] <sub>12</sub>        |      |
| 211-CODIS-D21S11-3  | 3.45       | [TCTA] <sub>6</sub> [TCTG] <sub>5</sub> [TCTA] <sub>3</sub> TA[TCTA] <sub>3</sub> TCA[TCTA] <sub>2</sub> TCCA TA [TCTA] <sub>10</sub><br>[TCTA] <sub>5</sub> [TCTG] <sub>6</sub> [TCTA] <sub>3</sub> TA[TCTA] <sub>3</sub> TCA[TCTA] <sub>2</sub> TCCA TA [TCTA] <sub>11</sub>        |      |
| 212-CODIS-D3S1358-1 | 2.00       | TCTA[TCTG] <sub>2</sub> [TCTA] <sub>12</sub><br>TCTA[TCTG] <sub>2</sub> [TCTA] <sub>12</sub>                                                                                                                                                                                          |      |

|                     |      |                                                                                                                                                        |                 |
|---------------------|------|--------------------------------------------------------------------------------------------------------------------------------------------------------|-----------------|
| 213-CODIS-D3S1358-2 | 2.00 | TCTA[TCTG] <sub>2</sub> [TCTA] <sub>11</sub><br>TCTA[TCTG] <sub>2</sub> [TCTA] <sub>12</sub>                                                           | skip tail 100bp |
| 214-CODIS-D3S1358-3 | 1.74 | TCTA[TCTG] <sub>2</sub> [TCTA] <sub>13</sub><br>TCTA[TCTG] <sub>3</sub> [TCTA] <sub>13</sub>                                                           | skip tail 100bp |
| 215-CODIS-D5S818-1  | 2.25 | [AGAT] <sub>10</sub><br>[AGAT] <sub>11</sub>                                                                                                           |                 |
| 216-CODIS-D5S818-2  | 2.43 | [AGAT] <sub>10</sub><br>[AGAT] <sub>14</sub>                                                                                                           |                 |
| 217-CODIS-D5S818-3  | 2.37 | [AGAT] <sub>11</sub><br>[AGAT] <sub>12</sub>                                                                                                           |                 |
| 218-CODIS-D8S1179-1 | 1.97 | [TCTA] <sub>11</sub><br>[TCTA] <sub>1</sub> [TCTG] <sub>1</sub> [TCTA] <sub>12</sub>                                                                   |                 |
| 220-CODIS-D8S1179-3 | 2.35 | [TCTA] <sub>11</sub><br>[TCTA] <sub>1</sub> [TCTG] <sub>1</sub> [TCTA] <sub>13</sub>                                                                   |                 |
| 221-CODIS-FGA-1     | 4.44 | [TTTC] <sub>3</sub> TTTT TTCT[CTTT] <sub>15</sub> CTCC[TTCC] <sub>2</sub><br>[TTTC] <sub>3</sub> TTTT TTCT[CTTT] <sub>15</sub> CTCC[TTCC] <sub>2</sub> |                 |
| 222-CODIS-FGA-2     | 2.00 | [TTTC] <sub>3</sub> TTTT TTCT[CTTT] <sub>13</sub> CTCC[TTCC] <sub>2</sub><br>[TTTC] <sub>3</sub> TTTT TTCT[CTTT] <sub>13</sub> CTCC[TTCC] <sub>2</sub> |                 |
| 223-CODIS-FGA-3     | 2.00 | [TTTC] <sub>3</sub> TTTT TTCT[CTTT] <sub>14</sub> CTCC[TTCC] <sub>2</sub><br>[TTTC] <sub>3</sub> TTTT TTCT[CTTT] <sub>17</sub> CTCC[TTCC] <sub>2</sub> |                 |
| 224-CODIS-TH01-1    | 1.71 | [AATG] <sub>7</sub><br>[AATG] <sub>10</sub>                                                                                                            |                 |
| 225-CODIS-TH01-2    | 1.36 | [AATG] <sub>7</sub><br>[AATG] <sub>9</sub>                                                                                                             |                 |
| 226-CODIS-TH01-3    | 2.01 | [AATG] <sub>6</sub><br>[AATG] <sub>9</sub>                                                                                                             |                 |
| 227-CODIS-TPOX-1    | 2.02 | [AATG] <sub>8</sub><br>[AATG] <sub>11</sub>                                                                                                            | skip head 100bp |

|                  |      |                                            |  |
|------------------|------|--------------------------------------------|--|
| 228-CODIS-TPOX-2 | 2.00 | [AATG] <sub>8</sub><br>[AATG] <sub>8</sub> |  |
| 229-CODIS-TPOX-3 | 3.94 | [AATG] <sub>8</sub><br>[AATG] <sub>8</sub> |  |

Supplementary Table 5 : The filename, LRI cutoff value, and HPV genotype in dual infection cervical cancers samples in this study

| Filename      | LRI cutoff  | HPV type  |
|---------------|-------------|-----------|
| 300-HPV-33-81 | <b>4.71</b> | HPV 33/81 |
| 301-HPV-42-71 | 2.00        | HPV 42/71 |
| 302-HPV-52-18 | <b>4.50</b> | HPV 52/18 |
| 303-HPV-54-67 | <b>3.66</b> | HPV 54/67 |
| 304-HPV-6-53  | 5.45        | HPV 6/53  |
| 305-HPV-53-52 | <b>3.56</b> | HPV 53/52 |
| 306-HPV-52-70 | <b>2.00</b> | HPV 52/70 |

Supplementary Table 6 : The copy number ratio of DEFB4/HSPDP3 predicted by MSR program and T/A cloning experiment

| Sample | T/A Cloning |       | MSR Result |       | T/A Cloning          |                      | MSR Result           |                      |
|--------|-------------|-------|------------|-------|----------------------|----------------------|----------------------|----------------------|
|        | HSPDP3      | DEFB4 | HSPDP3     | DEFB4 | Log2(DEFB4/HSPDP3*2) | Log2(DEFB4/HSPDP3*2) | Log2(DEFB4/HSPDP3*2) | Log2(DEFB4/HSPDP3*2) |
| 629    | 3           | 5     | 2          | 3     | 2                    | 2                    | 2                    | 2                    |
| 654    | 3           | 11    | 2          | 6     | 3                    | 3                    | 3                    | 3                    |
| 658    | 5           | 5     | 2          | 3     | 1                    | 1                    | 1                    | 1                    |
| 718    | 3           | 14    | 2          | 8     | 3                    | 3                    | 3                    | 3                    |
| 728    | 3           | 3     | 2          | 3     | 1                    | 1                    | 1                    | 1                    |



(A)

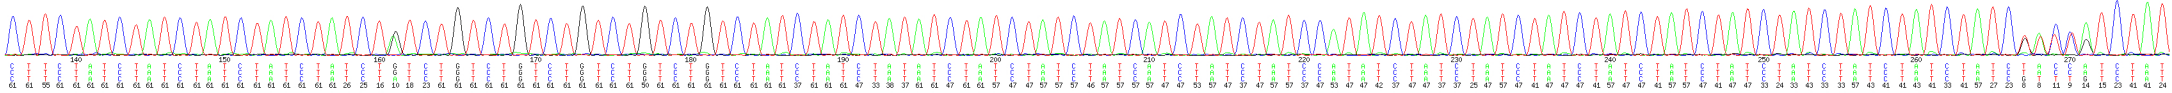

(B)

$\overbrace{CTTCTATCTATCTATCTATCTA}^1 \text{----} \overbrace{TCTGTCTGTCTGTCTGTCTGTCTGTCTATCTA}^1 \overbrace{TCTATCTA}^2 \overbrace{TCTATCTA}^3 \overbrace{TCTATCTA}^4 \overbrace{TCTATCTA}^5 \overbrace{TCTATCTA}^6 \text{----} \overbrace{TATCTATCTATCTATCATCTATCTATCCATA}^1 \overbrace{TCTATCTA}^2 \overbrace{TCTATCTA}^3 \overbrace{TCTATCTA}^4 \overbrace{TCTATCTA}^5 \overbrace{TCTATCTA}^6 \overbrace{TCTATCTA}^7 \overbrace{TCTATCTA}^8 \overbrace{TCTATCTA}^9 \overbrace{TCTATCTA}^{10} \overbrace{TCTATCTATC}^{11} \text{----} \text{GTCTAT}$   
 $\underbrace{CTTCTATCTATCTATCTATCTA}^1 \underbrace{TCTGTCTGTCTGTCTGTCTGTCTGTCTATCTA}^2 \underbrace{TCTATCTA}^3 \underbrace{TCTATCTA}^4 \underbrace{TCTATCTA}^5 \underbrace{TCTATCTA}^6 \underbrace{TCTATCTA}^7 \underbrace{TCTATCTA}^8 \underbrace{TCTATCTA}^9 \underbrace{TCTATCTA}^{10} \underbrace{TCTATCTATC}^{11} \text{----} \text{GTCTAT}$

Supplementary Fig. 1 (A) Chromatography trace of one Indel [CA] STR repeat structure and those of plasmid cloning, (B) MSR analyzed results are shown as the IUPAC code and decomposed sequences

(A)

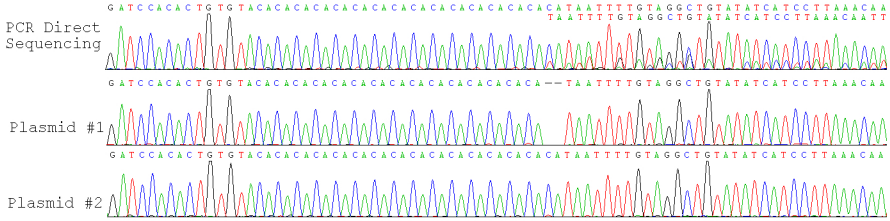

(B)

chr5:172593038  
 MSR IUPAC GATCCCACTGTGTACACACACACACACACACACACACACAYAWWWTTKTRKRSKSTRATMWMYMYWWAMAMWW  
 MSR Result #1 GATCCCACTGTGTACACACACACACACACACACACACACACA--TAATTTTGTAGGCTGTATATCATCCTTAAACAA  
 MSR Result #2 GATCCCACTGTGTACACACACACACACACACACACACACACACATAAATTTTGTAGGCTGTATATCATCCTTAAACAA

Supplementary Fig. 2 (A) Chromatography trace of a combined two CODIS D21S11 Locus subtype, (B) there were two 4-bp gaps in the alignment of two subtypes in CODIS D21S11 Locus.
